# Supplementary material for: Correlation between Prenatal Exposure to Polybrominated Diphenyl Ethers (PBDEs) and Infant Birth Outcomes: A Meta-Analysis and an Experimental Study
Source: MDPI journal article supplement (doi:10.3390/ijerph14030268), 2017-03-07
Supplement: s1 [file s1]

# Supplementary Materials: Correlation between Prenatal Exposure to Polybrominated Diphenyl Ethers (PBDEs) and Infant Birth Outcomes: A Meta-Analysis and An Experimental Study

Xuemin Zhao, Shiqiao Peng, Yang Xiang, Yali Yang, Jing Li, Zhongyan Shan and Weiping Teng

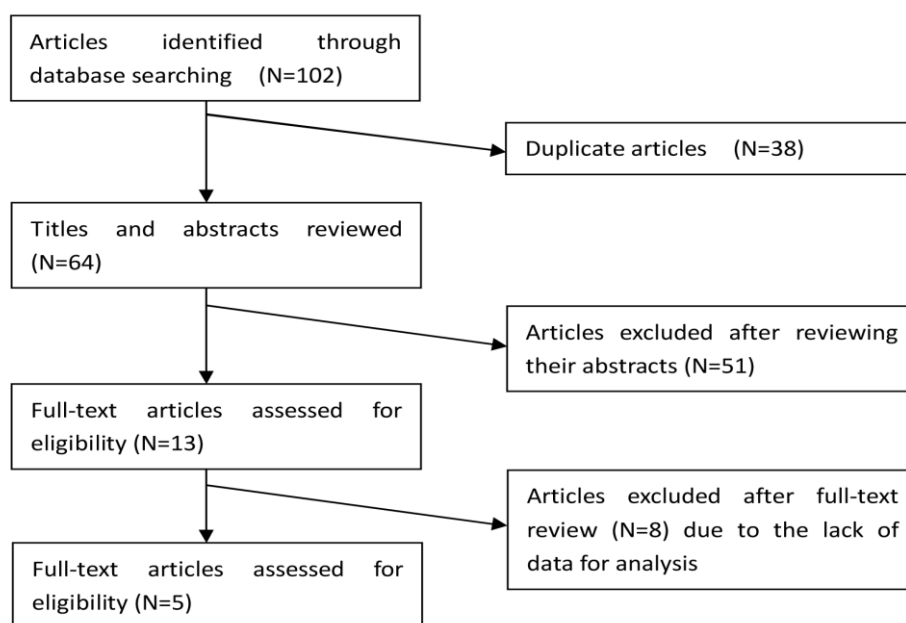

**Figure S1.** Flow diagram of the article selection process.

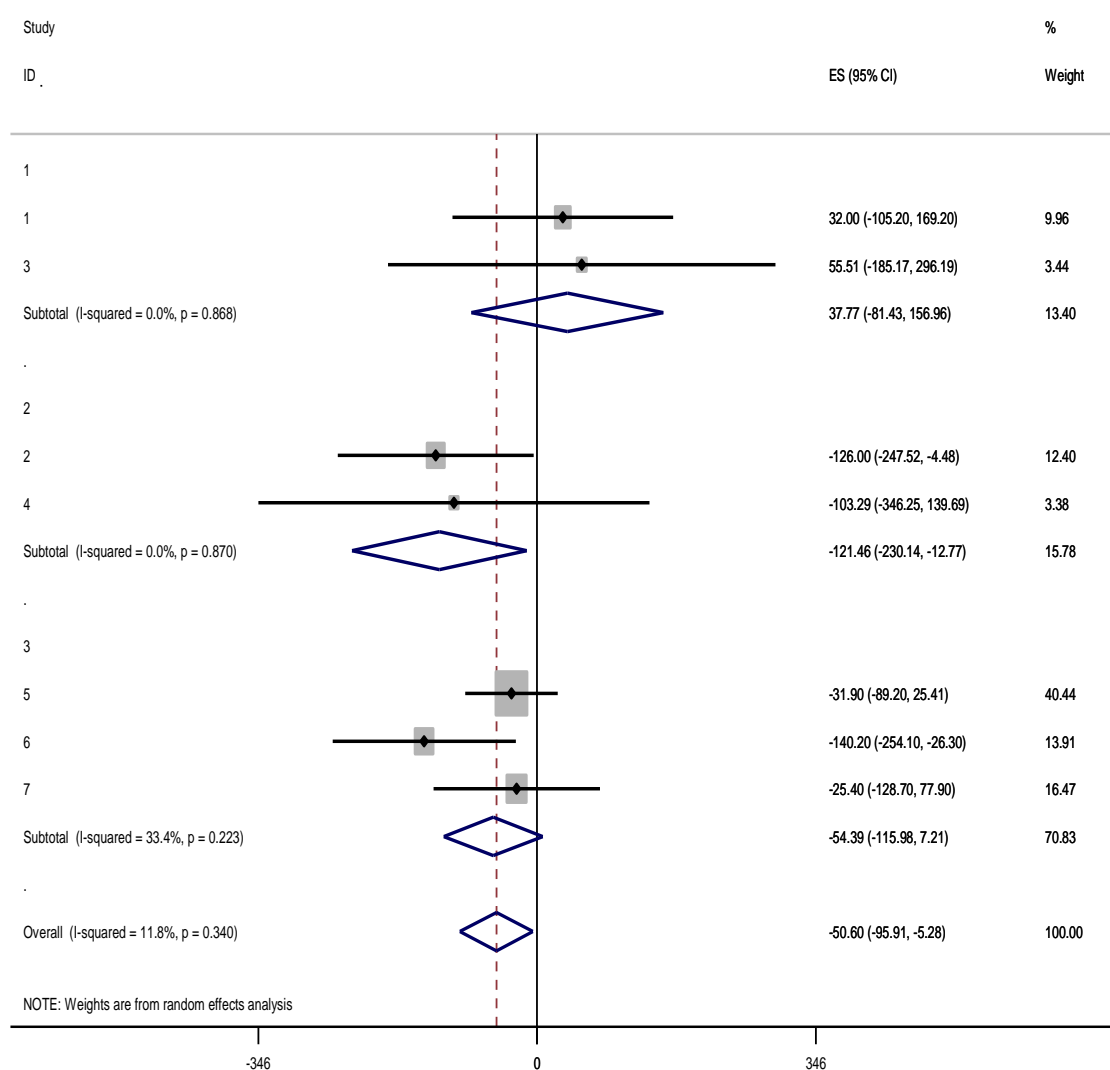

**Figure S2.** Forest plot of pooled  $\beta$  values for the association between prenatal exposure to polybrominated diphenyl ethers (PBDEs) and birth weight. ES: effect size; CI: confidence interval; ID: identification; I-squared:  $I^2$

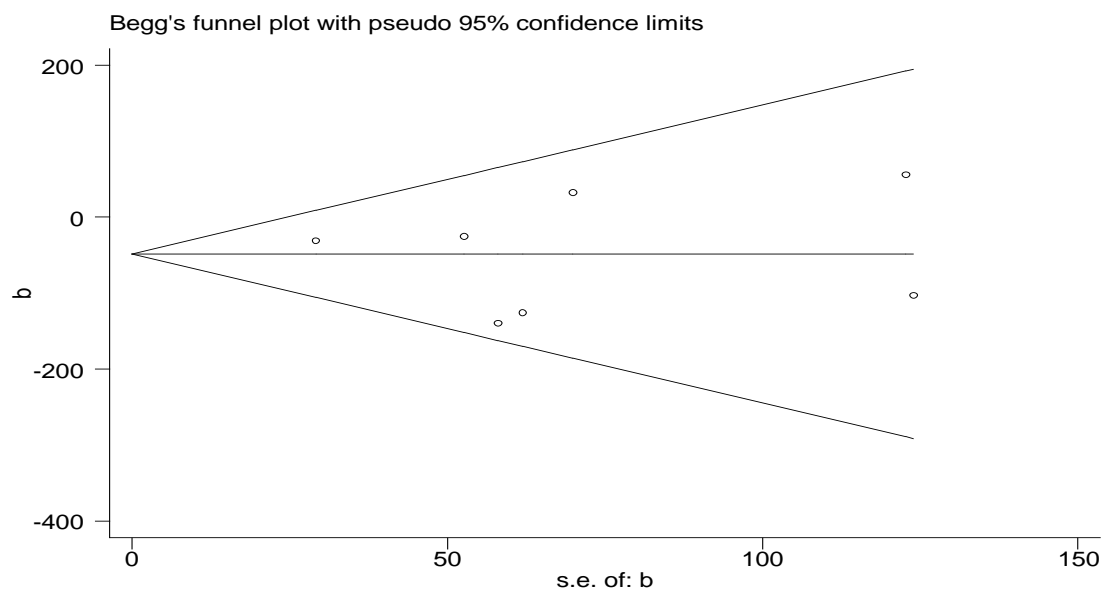

Figure S3. The Begg's funnel plot of the publication bias ( $p = 0.846$ ).

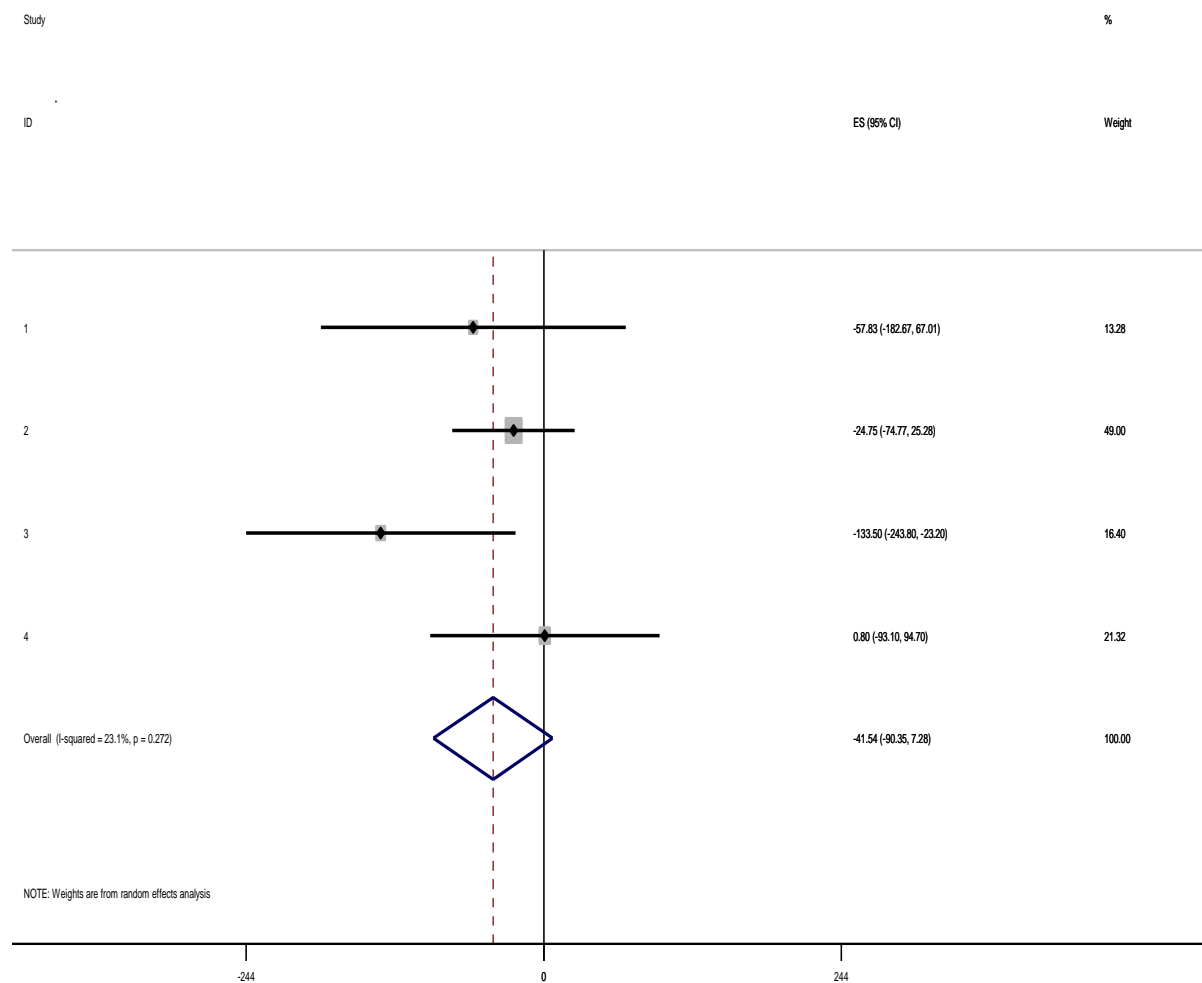

Figure S4. Forest plot of pooled  $\beta$  values for the association between prenatal exposure to 2,2',4,4'-Tetrabromodiphenyl ether (BDE47) and birth weight.

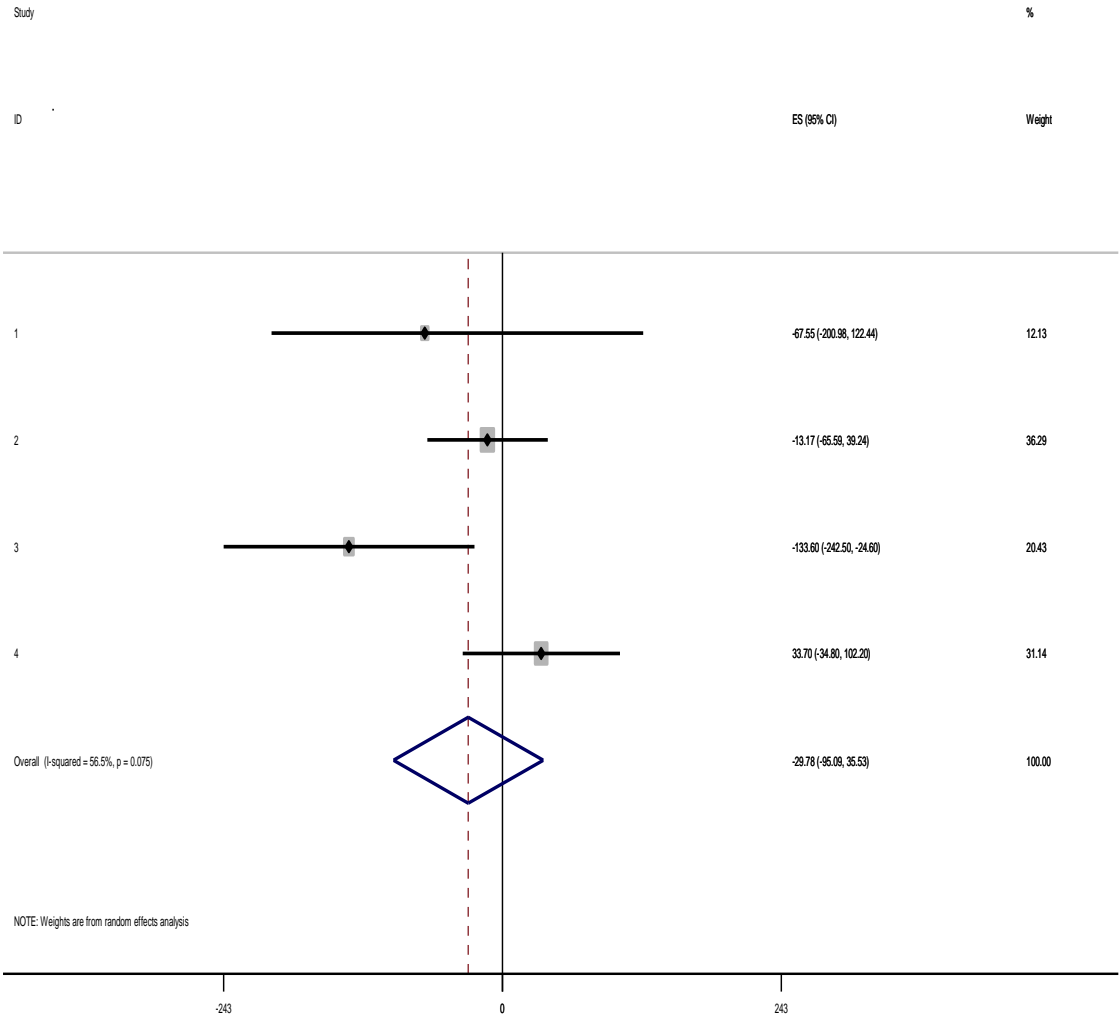

**Figure S5.** Forest plot of pooled  $\beta$  values for the association between prenatal exposure to 2,2',4,4',5-Pentabromodiphenyl ether (BDE99) and birth weight.

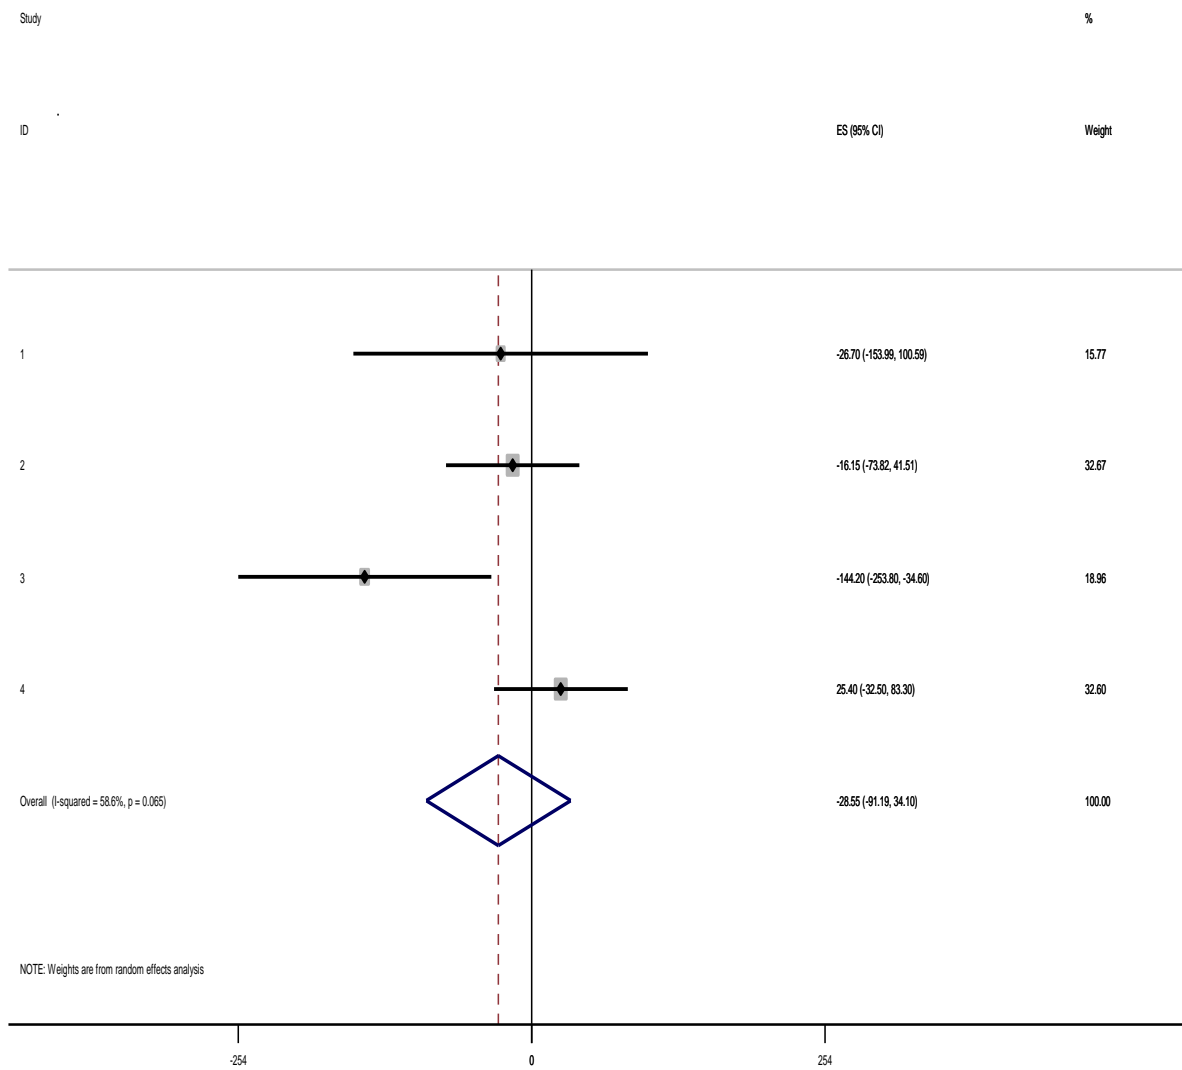

**Figure S6.** Forest plot of pooled  $\beta$  values for the association between prenatal exposure to 2,2',4,4',6-Pentabromodiphenyl ether (BDE100) and birth weight.

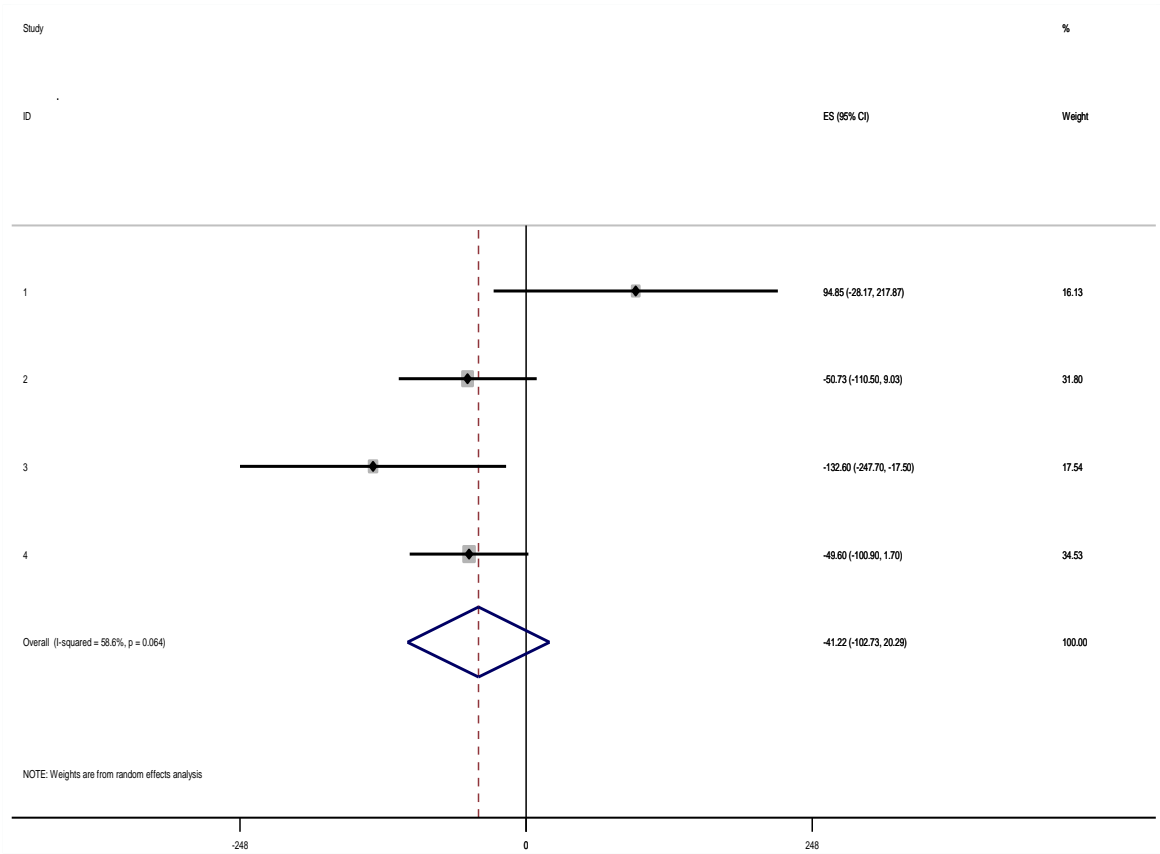

**Figure S7.** Forest plot of pooled  $\beta$  values for the association between prenatal exposure to 2,2',4,4',5,5'-Hexabromodiphenyl ether (BDE153) and birth weight.

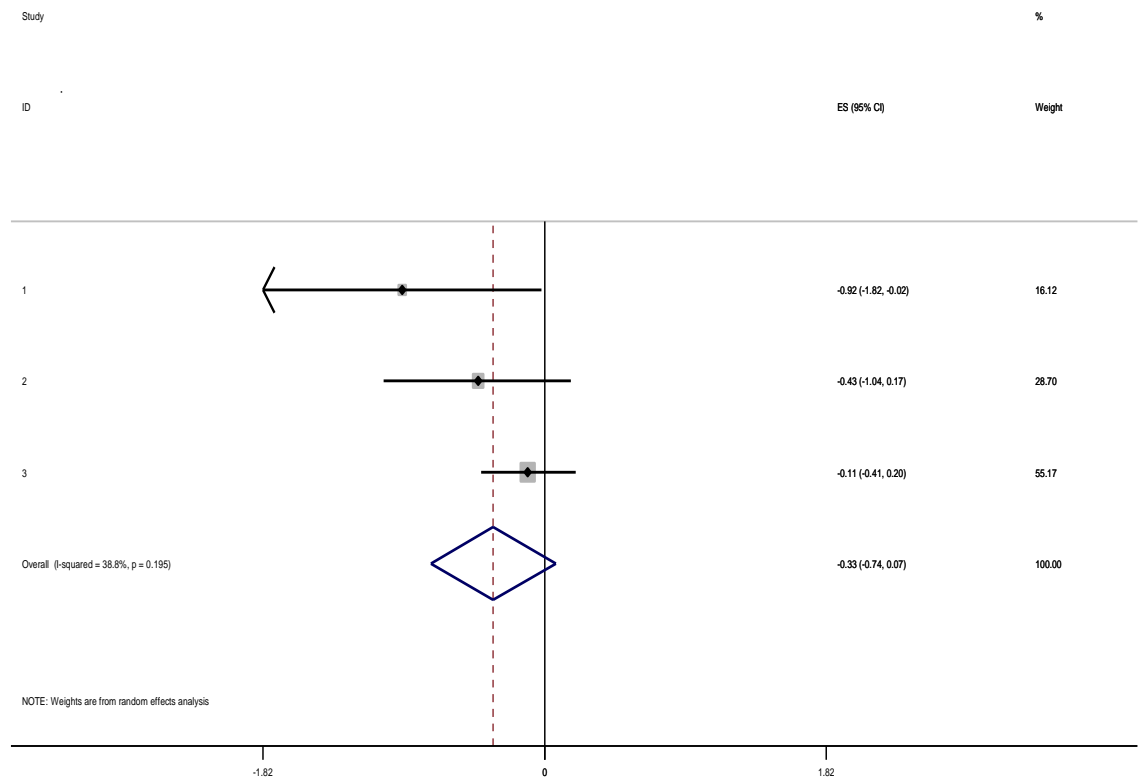

**Figure S8.** Forest plot of pooled  $\beta$  values for the association between prenatal exposure to PBDEs and birth length.

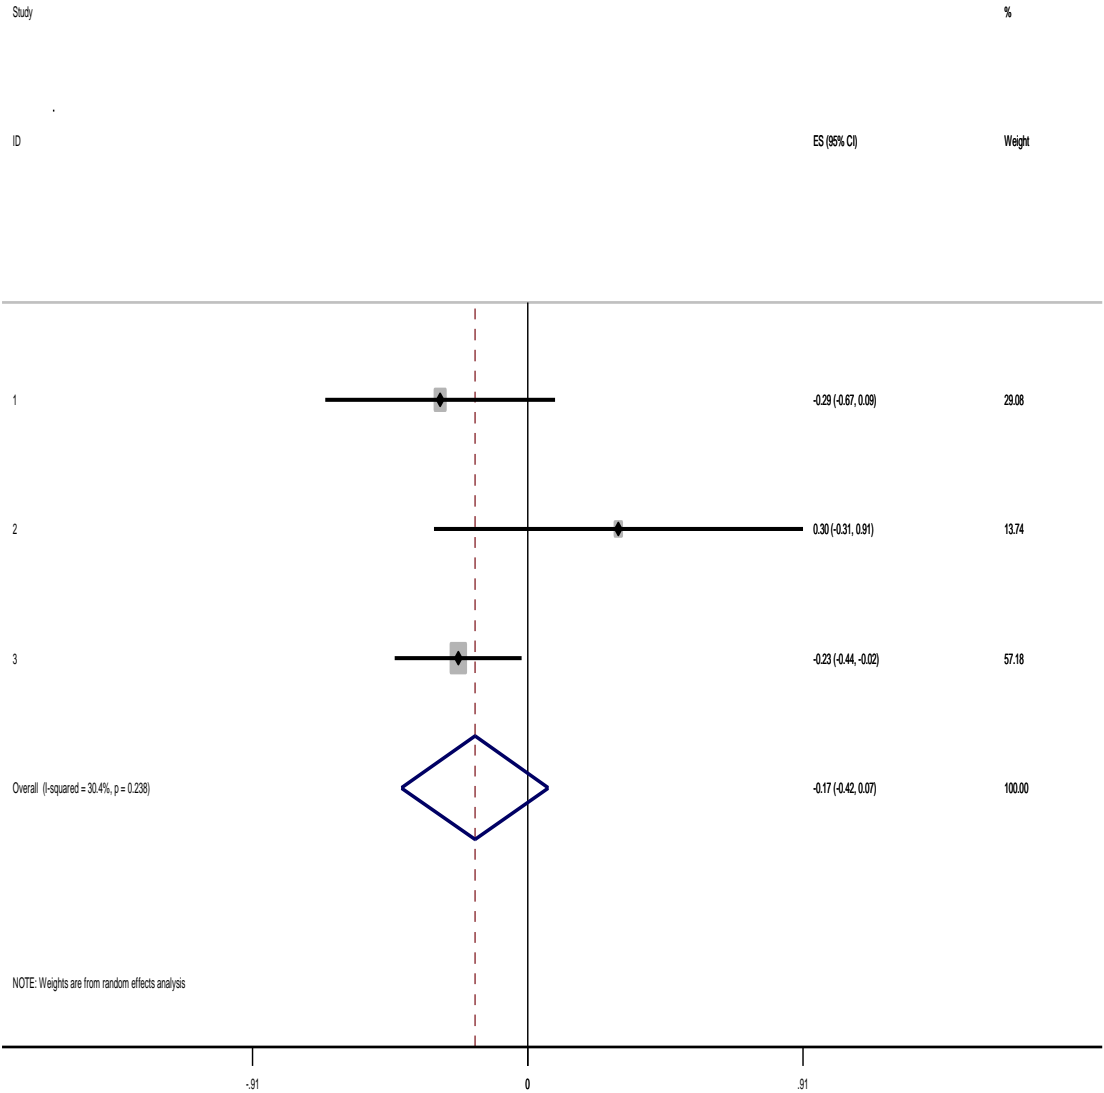

**Figure S9.** Forest plot of pooled  $\beta$  values for the association between prenatal exposure to PBDEs and head circumference.
